# Supplementary material for: Comparative Analysis of Biodegradable Mulches on Soil Bacterial Community and Pepper Cultivation
Source: MDPI journal article supplement (doi:10.3390/agronomy14050905), 2024-04-26
Supplement: s1 [file s1]

# Supplementary Material

Table S1 Details of the tested mulch films

| The processing number | Manufacturer                                     | Mulch film type | Thickness (mm) | Color | Width (m) | Origin   |
|-----------------------|--------------------------------------------------|-----------------|----------------|-------|-----------|----------|
| PP-JL                 | Xifeng Company, Hunjiang, China                  | PBAT+PLA        | 0.01           | Black | 1.2       | Jilin    |
| PP-SD                 | Qing Tian Company, Linyi, China                  | PBAT+PLA        | 0.01           | Black | 1.2       | Shandong |
| PP-SH                 | Hongtui Company, Shanghai, China                 | PBAT+PLA        | 0.01           | Black | 1.2       | Shanghai |
| PPC-BK                | Garden-Bee Horticulture Company, Hangzhou, China | PPC             | 0.01           | Black | 1.2       | Hangzhou |
| PPC-BR                |                                                  |                 | 0.01           | Brown | 1.2       |          |
| PE                    | Jinye Company, Guangzhou, China                  | PE              | 0.01           | Black | 1.2       | Canton   |
| PCK                   | -                                                | Not covered     | -              | -     | -         | -        |
| NCK                   | -                                                | Mulching        | -              | -     | -         | -        |

Biodegradable mulch films: PP-JL, PP-SD, PP-SH, PPC-BK, and PPC-BR. Polyethylene mulch: PE. Straw mulching: NCK. Uncovered control: PCK.

Table S2 Degradation strength of BMF and PE films

| Dispose | Number of days after lamination |     |     |     |     |     |     |     |     |      |      |      |
|---------|---------------------------------|-----|-----|-----|-----|-----|-----|-----|-----|------|------|------|
|         | 5d                              | 13d | 21d | 40d | 50d | 55d | 64d | 79d | 88d | 100d | 120d | 129d |
| PP-JL   | 0                               | 0   | 0   | 1   | 1   | 1   | 1   | 1   | 1   | 2    | 3    | 3    |
| PP-SH   | 0                               | 0   | 0   | 0   | 0   | 0   | 1   | 1   | 1   | 3    | 4    | 4    |
| PP-SD   | 0                               | 0   | 0   | 0   | 0   | 1   | 1   | 1   | 4   | 4    | 5    | 5    |
| PPC-BK  | 0                               | 0   | 0   | 0   | 1   | 1   | 3   | 4   | 4   | 5    | 7    | 7    |
| PPC-BR  | 0                               | 0   | 1   | 2   | 2   | 4   | 5   | 6   | 6   | 7    | 8    | 8    |
| PE      | 0                               | 0   | 0   | 0   | 0   | 0   | 0   | 0   | 0   | 1    | 1    | 1    |

Biodegradable mulch films: PP-JL, PP-SD, PP-SH, PPC-BK, and PPC-BR. Polyethylene mulch: PE. Straw mulching: NCK. Uncovered control: PCK.

Table S3 Agronomic characters and yield of pepper treated with plastic films

| Dispose | Plant height (cm) | Stem diameter (mm) | Equivalent to yield per hectare (kg/hm <sup>2</sup> ) |
|---------|-------------------|--------------------|-------------------------------------------------------|
| PP-JL   | 27.98±1.12a       | 6.01±0.08a         | 5890±1633.309a                                        |
| PP-SH   | 28.35±3.23a       | 6.67±1.40a         | 4760±1455.885a                                        |
| PP-SD   | 27.35±2.80a       | 6.77±0.59a         | 4546.667±1774.608a                                    |
| PPC-BK  | 28.56±3.38a       | 6.93±0.50a         | 4823.333±1393.999a                                    |
| PPC-BR  | 27.65±1.40a       | 6.82±1.24a         | 4833.333±686.319a                                     |

|     |             |            |                |
|-----|-------------|------------|----------------|
| PE  | 27.97±2.69a | 6.50±1.13a | 5140±2391.004a |
| PCK | 25.30±4.31a | 5.44±0.55a | 3290±1774.852a |
| NCK | 28.91±3.80a | 6.66±0.82a | 3820±530a      |

Note: Mean ±SD. Different lowercase letters mean significant differences between different mulching treatments at  $P < 0.05$ , one-way ANOVA. Biodegradable mulch films: PP-JL, PP-SD, PP-SH, PPC-BK, and PPC-BR. Polyethylene mulch: PE. Straw mulching: NCK. Uncovered control: PCK.

Table S4 MRPP analysis of bacterial community in different treatments

|    | MRPP   | PP-JL  | PP-SH  | PP-SD  | PPC-BK       | PPC-BR       | PE           | PCK   |
|----|--------|--------|--------|--------|--------------|--------------|--------------|-------|
| T1 | PP-JL  | 0      | 0.125  | 0.1    | <b>0.026</b> | <b>0.013</b> | 0.084        | 0.004 |
|    | PP-SH  | 0.4566 | 0      | 0.062  | <b>0.036</b> | 0.077        | 0.087        | 0.006 |
|    | PP-SD  | 0.4146 | 0.4393 | 0      | <b>0.003</b> | <b>0.006</b> | 0.266        | 0.001 |
|    | PPC-BK | 0.4207 | 0.446  | 0.4049 | 0            | 0.087        | <b>0.026</b> | 0.024 |
|    | PPC-BR | 0.4346 | 0.4637 | 0.4173 | 0.424        | 0            | <b>0.016</b> | 0.098 |
|    | PE     | 0.4441 | 0.4715 | 0.4283 | 0.4344       | 0.4494       | 0            | 0.005 |
|    | PCK    | 0.4358 | 0.4625 | 0.42   | 0.4261       | 0.4404       | 0.4495       | 0     |
| T2 | PP-JL  | 0      | 0.318  | 0.32   | 0.177        | <b>0.045</b> | 0.217        | 0.08  |
|    | PP-SH  | 0.3955 | 0      | 0.118  | 0.318        | 0.056        | 0.223        | 0.028 |
|    | PP-SD  | 0.3835 | 0.3662 | 0      | <b>0.036</b> | <b>0.003</b> | 0.144        | 0.006 |
|    | PPC-BK | 0.4106 | 0.3958 | 0.3838 | 0            | <b>0.023</b> | 0.197        | 0.008 |
|    | PPC-BR | 0.4212 | 0.4073 | 0.3943 | 0.4215       | 0            | 0.025        | 0.18  |
|    | PE     | 0.3883 | 0.3715 | 0.3615 | 0.3886       | 0.3992       | 0            | 0.002 |
|    | PCK    | 0.4148 | 0.4004 | 0.388  | 0.4151       | 0.4257       | 0.3928       | 0     |
| T3 | PP-JL  | 0      | 0.232  | 0.177  | <b>0.024</b> | <b>0.004</b> | <b>0.016</b> | 0.004 |
|    | PP-SH  | 0.3808 | 0      | 0.016  | <b>0.035</b> | <b>0.005</b> | <b>0.002</b> | 0.002 |
|    | PP-SD  | 0.4055 | 0.3798 | 0      | <b>0.04</b>  | <b>0.006</b> | 0.054        | 0.078 |
|    | PPC-BK | 0.4246 | 0.3989 | 0.4236 | 0            | 0.499        | 0.082        | 0.427 |
|    | PPC-BR | 0.416  | 0.3902 | 0.4149 | 0.4341       | 0            | 0.076        | 0.555 |
|    | PE     | 0.3842 | 0.3585 | 0.3832 | 0.4023       | 0.3936       | 0            | 0.046 |
|    | PCK    | 0.4081 | 0.3824 | 0.4071 | 0.4262       | 0.4176       | 0.3858       | 0     |

Note: Blacked-out font indicates a significant difference. The significant ( $p < 0.05$ , one-way ANOVA) differences are indicated in bold. T1: May 10<sup>th</sup>. T2: June 10<sup>th</sup>. T3: July 10<sup>th</sup>. Biodegradable mulch films: PP-JL, PP-SD, PP-SH, PPC-BK, and PPC-BR. Polyethylene mulch: PE. Straw mulching: NCK. Uncovered control: PCK.

Table S5 Alpha diversity of bacterial community in different mulches

|    | Treatment | Shannon      | Simpson       | Chao1       |
|----|-----------|--------------|---------------|-------------|
| T1 | PP-JL     | 6.69±0.11b   | 0.050±0.02c   | 6186±392ab  |
|    | PP-SH     | 6.61±0.17b   | 0.0467±0.02c  | 5883±328b   |
|    | PP-SD     | 6.72±0.16ab  | 0.055±0.02bc  | 5934±316b   |
|    | PPC-BK    | 6.92±0.07a   | 0.075±0.01ab  | 6205±300ab  |
|    | PPC-BR    | 6.93±0.04a   | 0.086±0.01a   | 6149±208ab  |
|    | PE        | 6.75±0.35ab  | 0.061±0.03bc  | 6431±381a   |
|    | PCK       | 6.92±0.12a   | 0.067±0.02abc | 6195±316ab  |
|    | NCK       | 6.78±0.23ab  | 0.058±0.03bc  | 5908±398b   |
| T2 | PP-JL     | 6.22±0.30d   | 0.031±0.02b   | 5393±309c   |
|    | PP-SH     | 6.45±0.18cd  | 0.034±0.01b   | 5718±273bc  |
|    | PP-SD     | 6.31±0.27d   | 0.030±0.01b   | 5476±457c   |
|    | PPC-BK    | 6.35±0.15d   | 0.034±0.01b   | 5291±359c   |
|    | PPC-BR    | 6.78±0.14a   | 0.057±0.02a   | 6194±499ab  |
|    | PE        | 6.47±0.19bcd | 0.036±0.01b   | 6084±399ab  |
|    | PCK       | 6.66±0.32abc | 0.042±0.02ab  | 6002±498b   |
|    | NCK       | 6.72±0.12ab  | 0.036±0.01b   | 6514±272a   |
| T3 | PP-JL     | 6.56±0.17c   | 0.049±0.02b   | 5705±306bc  |
|    | PP-SH     | 6.74±0.14ab  | 0.056±0.01ab  | 6022±495abc |
|    | PP-SD     | 6.63±0.24bc  | 0.057±0.02ab  | 5631±302c   |
|    | PPC-BK    | 6.76±0.10ab  | 0.060±0.01ab  | 5644±206c   |
|    | PPC-BR    | 6.88±0.12a   | 0.074±0.02a   | 6396±325a   |
|    | PE        | 6.82±0.08a   | 0.068±0.02ab  | 6147±492ab  |
|    | PCK       | 6.84±0.09a   | 0.062±0.02ab  | 6311±544a   |
|    | NCK       | 6.82±0.08a   | 0.056±0.02ab  | 6131±325ab  |

Note: Different lowercase letters mean significant differences between different mulching treatments at  $P < 0.05$ , one-way ANOVA. T1: May 10<sup>th</sup>. T2: June 10<sup>th</sup>. T3: July 10<sup>th</sup>. Biodegradable mulch films: PP-JL, PP-SD, PP-SH, PPC-BK, and PPC-BR. Polyethylene mulch: PE. Straw mulching: NCK. Uncovered control: PCK.

Table S6 Number of nodes and connections in the building network

| Treatment | T1              |                       | T2              |                       | T3              |                       |
|-----------|-----------------|-----------------------|-----------------|-----------------------|-----------------|-----------------------|
|           | Number of nodes | Number of connections | Number of nodes | Number of connections | Number of nodes | Number of connections |
| PP-JL     | 766             | 1633                  | 694             | 1739                  | 772             | 1529                  |
| PP-SH     | 865             | 2164                  | 947             | 5626                  | 927             | 1898                  |
| PP-SD     | 788             | 1064                  | 875             | 6963                  | 863             | 1465                  |
| PPC-BK    | 910             | 1346                  | 592             | 1137                  | 776             | 1340                  |
| PPC-BR    | 1135            | 7885                  | 980             | 5229                  | 926             | 2419                  |
| PE        | 881             | 1458                  | 761             | 1237                  | 977             | 1907                  |
| PCK       | 888             | 1619                  | 856             | 1686                  | 877             | 1728                  |
| NCK       | 774             | 1369                  | 968             | 1736                  | 1030            | 2036                  |

T1: May 10<sup>th</sup>. T2: June 10<sup>th</sup>. T3: July 10<sup>th</sup>. Biodegradable mulch films: PP-JL, PP-SD, PP-SH, PPC-BK, and PPC-BR. Polyethylene mulch: PE. Straw mulching: NCK. Uncovered control: PCK.

Table S7 Molecular ecological network index of soil bacterial communities covered by different mulches

| Network Indexes |        | R square of power-law | Average degree (avgK) | Average clustering coefficient (avgCC) | Average path distance (GD) |
|-----------------|--------|-----------------------|-----------------------|----------------------------------------|----------------------------|
| T1              | PP-JL  | 0.883                 | 4.264                 | 0.308                                  | 9.065                      |
|                 | PP-SH  | 0.736                 | 5.003                 | 0.479                                  | 10.959                     |
|                 | PP-SD  | 0.846                 | 2.701                 | 0.278                                  | 14.424                     |
|                 | PPC-BK | 0.792                 | 2.958                 | 0.286                                  | 12.859                     |
|                 | PPC-BR | 0.173                 | 13.894                | 0.499                                  | 5.828                      |
|                 | PE     | 0.763                 | 3.31                  | 0.312                                  | 11.693                     |
|                 | PCK    | 0.792                 | 3.646                 | 0.378                                  | 9.845                      |
|                 | NCK    | 0.808                 | 3.537                 | 0.29                                   | 9.739                      |
| T2              | PP-JL  | 0.877                 | 5.012                 | 0.318                                  | 6.424                      |
|                 | PP-SH  | 0.255                 | 11.882                | 0.517                                  | 6.256                      |
|                 | PP-SD  | 0.769                 | 3.273                 | 0.319                                  | 12.117                     |
|                 | PPC-BK | 0.809                 | 3.841                 | 0.286                                  | 7.509                      |
|                 | PPC-BR | 0.047                 | 10.671                | 0.505                                  | 6.202                      |
|                 | PE     | 0.848                 | 3.251                 | 0.308                                  | 10.289                     |
|                 | PCK    | 0.882                 | 3.939                 | 0.335                                  | 9.524                      |
|                 | NCK    | 0.818                 | 3.587                 | 0.308                                  | 12.019                     |
| T3              | PP-JL  | 0.805                 | 3.961                 | 0.345                                  | 8.996                      |
|                 | PP-SH  | 0.801                 | 4.095                 | 0.353                                  | 10.342                     |
|                 | PP-SD  | 0.794                 | 3.395                 | 0.31                                   | 11.595                     |
|                 | PPC-BK | 0.823                 | 3.454                 | 0.301                                  | 9.509                      |
|                 | PPC-BR | 0.758                 | 5.225                 | 0.351                                  | 7.777                      |
|                 | PE     | 0.876                 | 3.904                 | 0.32                                   | 9.864                      |
|                 | PCK    | 0.81                  | 3.941                 | 0.314                                  | 10.138                     |
|                 | NCK    | 0.746                 | 3.953                 | 0.332                                  | 9.877                      |

T1: May 10<sup>th</sup>. T2: June 10<sup>th</sup>. T3: July 10<sup>th</sup>. Biodegradable mulch films: PP-JL, PP-SD, PP-SH, PPC-BK, and PPC-BR. Polyethylene mulch: PE. Straw mulching: NCK. Uncovered control: PCK.

Table S8 Number of critical nodes present in each network

| Treatment | T1        |              | T2        |              | T3        |              |
|-----------|-----------|--------------|-----------|--------------|-----------|--------------|
|           | Connector | Modular hubs | Connector | Modular hubs | Connector | Modular hubs |
| PP-JL     | 12        | 3            | 18        | 2            | 4         | 6            |
| PP-SH     | 5         | 5            | 7         | 13           | 11        | 7            |
| PP-SD     | 1         | 2            | 8         | 4            | 4         | 5            |
| PPC-BK    | 6         | 9            | 4         | 2            | 5         | 2            |
| PPC-BR    | 17        | 2            | 19        | 6            | 7         | 8            |
| PE        | 7         | 5            | 7         | 3            | 13        | 6            |
| PCK       | 4         | 3            | 3         | 8            | 7         | 4            |
| NCK       | 9         | 8            | 6         | 11           | 8         | 9            |

T1: May 10<sup>th</sup>. T2: June 10<sup>th</sup>. T3: July 10<sup>th</sup>. Biodegradable mulch films: PP-JL, PP-SD, PP-SH, PPC-BK, and PPC-BR. Polyethylene mulch: PE. Straw mulching: NCK. Uncovered control: PCK.

Table S9 Soil chemical properties in different mulches

| Period | Treatment | pH  | Organic matter | Available phosphorus | Total nitrogen |
|--------|-----------|-----|----------------|----------------------|----------------|
| T1     | PP-JL     | 6.9 | 15.7           | 34.4                 | 11.12          |
|        | PP-SH     | 7.2 | 14.4           | 27.1                 | 10.43          |
|        | PP-SD     | 7.3 | 16.3           | 38.1                 | 10.69          |
|        | PPC-BK    | 6.6 | 15.3           | 38.9                 | 10.23          |
|        | PPC-BR    | 6.8 | 15.6           | 30.5                 | 10.64          |
|        | PE        | 7   | 14.9           | 30.5                 | 10.68          |
|        | PCK       | 7.6 | 16.5           | 28.6                 | 12.02          |
|        | NCK       | 7.1 | 16.7           | 34.8                 | 13.09          |
| T2     | PP-JL     | 7.3 | 16             | 48.3                 | 12.43          |
|        | PP-SH     | 7.7 | 14.3           | 21.6                 | 10.31          |
|        | PP-SD     | 7.4 | 10.9           | 24.3                 | 9.53           |
|        | PPC-BK    | 7.7 | 14.9           | 26.8                 | 12.83          |
|        | PPC-BR    | 7.9 | 15.3           | 34.1                 | 11.99          |
|        | PE        | 7.4 | 15.7           | 28.7                 | 12.83          |
|        | PCK       | 7.6 | 17.2           | 35.4                 | 12.71          |
|        | NCK       | 7.9 | 16.6           | 25.6                 | 11.82          |
| T3     | PP-JL     | 7.2 | 16.6           | 33.5                 | 14.4           |
|        | PP-SH     | 7.4 | 13.8           | 28.7                 | 13.1           |
|        | PP-SD     | 7.1 | 13             | 14.7                 | 11.66          |
|        | PPC-BK    | 7.6 | 13.5           | 13.5                 | 11.73          |
|        | PPC-BR    | 7.8 | 12.8           | 10.7                 | 10.37          |
|        | PE        | 7.4 | 14             | 11                   | 11.71          |
|        | PCK       | 7.5 | 14.4           | 17.6                 | 8.69           |
|        | NCK       | 7.8 | 16.9           | 13.3                 | 10.86          |

Table S10 Mantel test analysis between soil environmental factors and bacterial community

| Envs          | r.BC   | p.BC         | r.JC   | p.JC         |
|---------------|--------|--------------|--------|--------------|
| pH            | 0.2265 | <b>0.001</b> | 0.2972 | <b>0.001</b> |
| AC_PH         | 0.0336 | 0.273        | 0.0512 | 0.181        |
| URE           | 0.3389 | <b>0.001</b> | 0.1812 | <b>0.002</b> |
| Sucrase       | 0.1527 | <b>0.002</b> | 0.095  | <b>0.022</b> |
| Glucuronidase | 0.0812 | 0.063        | 0.1004 | <b>0.031</b> |
| SOM           | -0.045 | 0.793        | -0.042 | 0.754        |
| AP            | 0.0701 | 0.104        | 0.0396 | 0.247        |
| TN            | -0.007 | 0.563        | -0.01  | 0.572        |

Note: The significant differences ( $p < 0.05$ ) are indicated in bold.

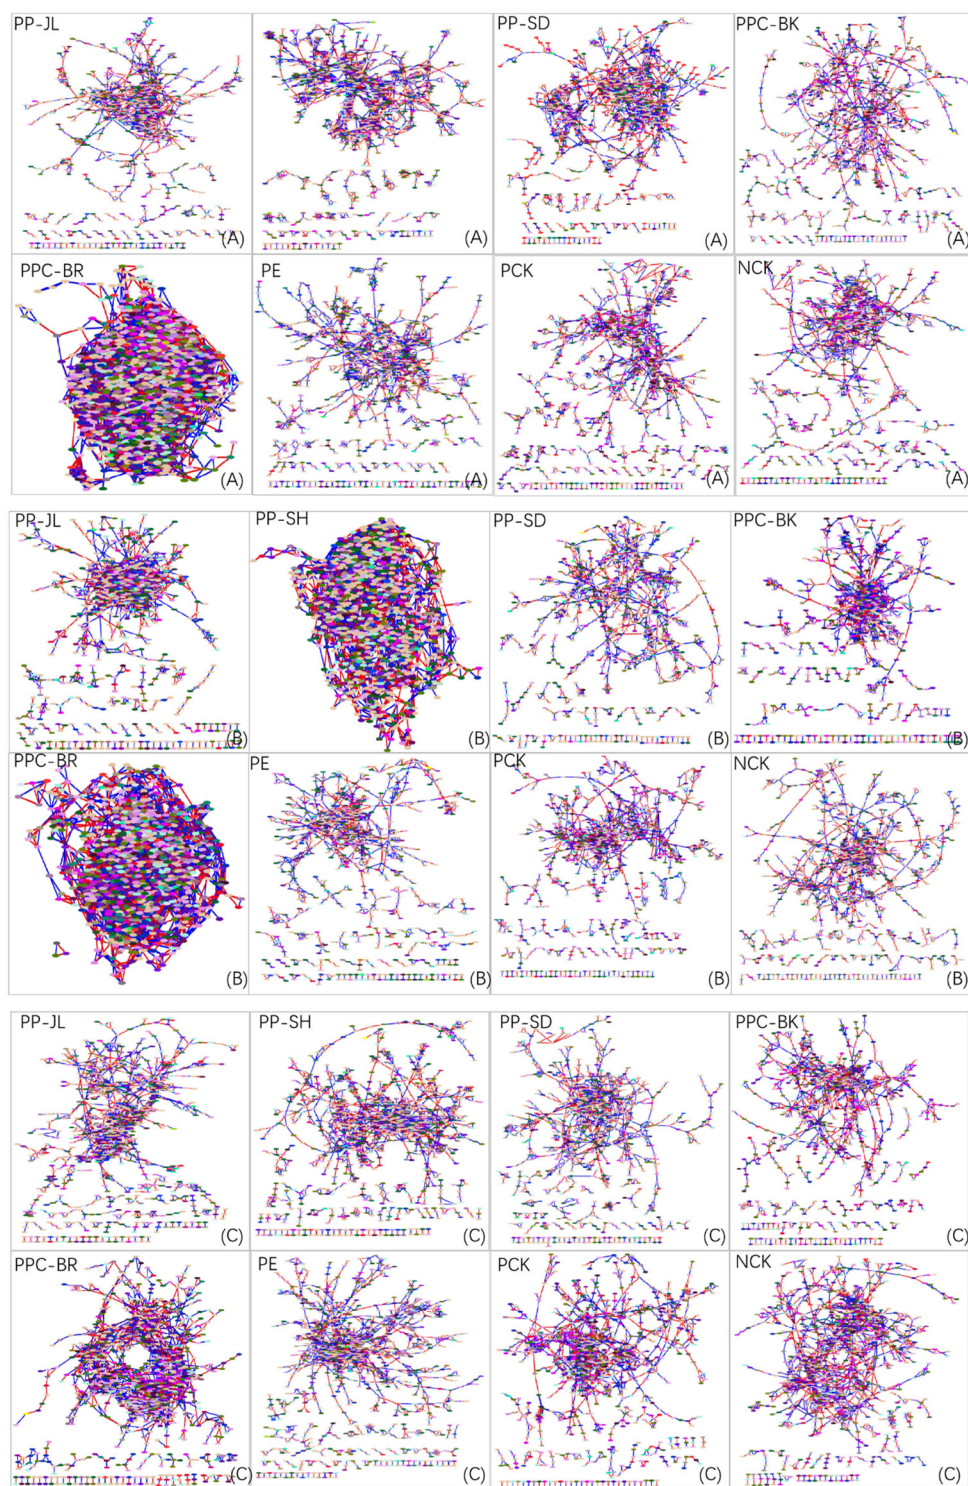

**Figure S1.** Molecular ecological network of bacterial communities in different mulches.

A: T1, B: T2, C: T3. A node represents an OTU, a node of the same color represents a node of the same gate classification, the red color of the connection line represents the positive interaction, and the gray color represents the negative interaction. T1: May 10<sup>th</sup>. T2: June 10<sup>th</sup>. T3: July 10<sup>th</sup>. Biodegradable mulch films: PP-JL, PP-SD, PP-SH, PPC-BK, and PPC-BR. Polyethylene mulch: PE. Straw mulching: NCK. Uncovered control: PCK.
